# Supplementary material
Source: MDPI journal article supplement (https://www.mdpi.com/2227-9040/11/8/466)
Supplement: s1 [file s1 › chemosensors-2521001-supplementary.pdf]

## Supporting Information

### Anodic stripping voltammetric determination of copper ions in cell culture media: from Transwell® to organ-on-chip systems

Carmela Tania Prontera, Elisa Sciurti\*, Chiara De Pascali\*, Lucia Giampetruzzi, Francesco Biscaglia, Laura Blasi, Vanessa Esposito, Flavio Casino, Pietro Siciliano and Luca Francioso

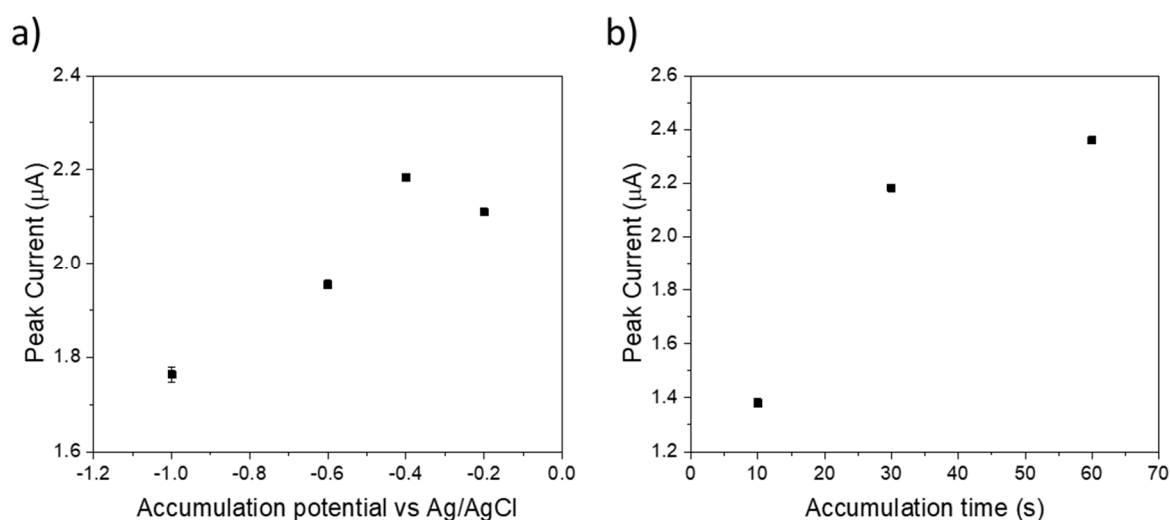

**Figure S1:** Parameter optimization for the accumulation step of ASV performed in the three-electrode configuration: peak current vs accumulation potential (30 s as accumulation time) for 20  $\mu\text{M}$   $\text{Cu}^{2+}$  solution (a), peak current vs accumulation time (-0.4 V as accumulation potential) for 20  $\mu\text{M}$   $\text{Cu}^{2+}$  solution (b).

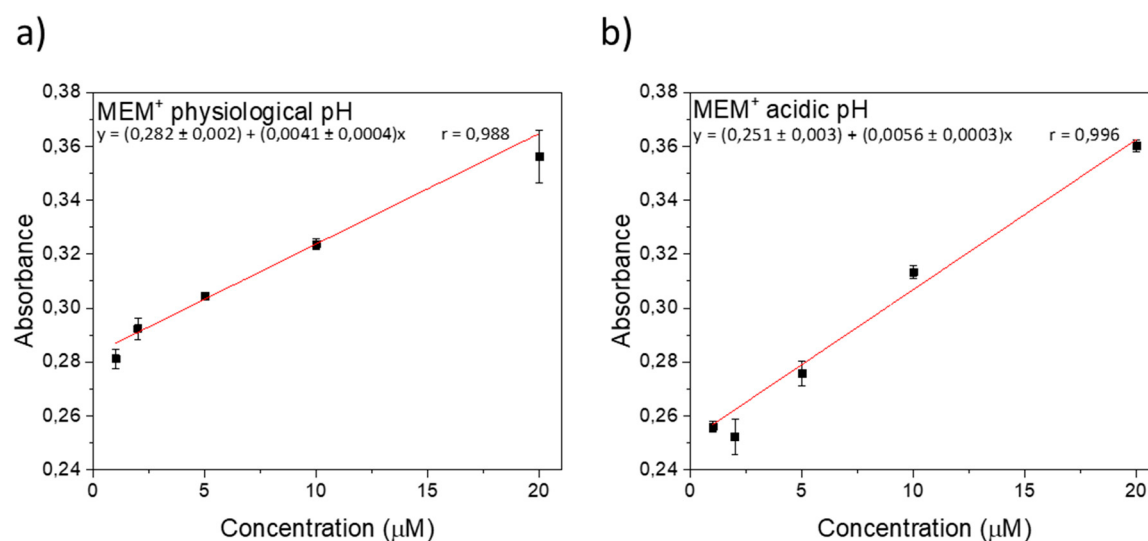

**Figure S2:** Colorimetric copper content quantification in MEM complete medium containing  $\text{Cu}^{2+}$  with a concentration ranging from 1  $\mu\text{M}$  to 20  $\mu\text{M}$  at pH 7.4 (a) and at pH 4 (b).

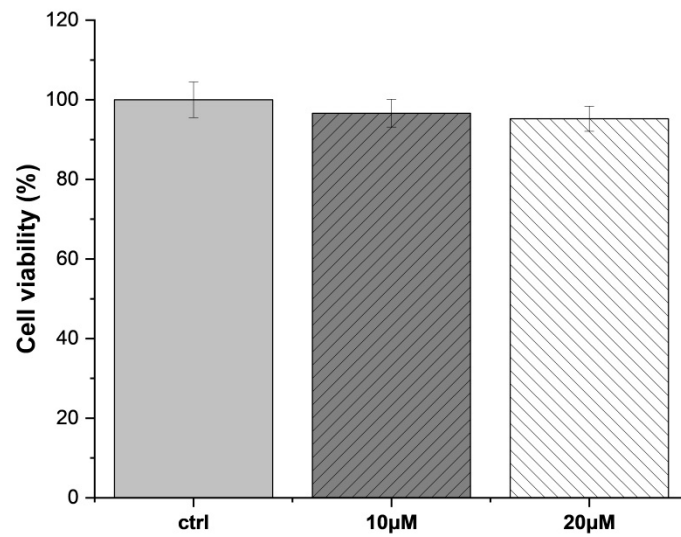

**Figure S3:** MTT assay to test viability of Caco-2 cells exposed to two concentration of copper ions (10  $\mu$ M and 20  $\mu$ M) for 72 hours: histograms represent the percentage (%) calculated by comparing the data of the exposed cells with those of the control cells (ctrl, 100%). All values are reported as the means  $\pm$  standard error. Statistically significant differences with respect to the control according to One-Way ANOVA;  $p < 0.05$ . Means comparison by Tukey's test.
